# Supplementary material for: Enteropathogenic Escherichia coli Uses NleA to Inhibit NLRP3 Inflammasome Activation
Source: PubMed Central journal article supplement (PMC4557958; doi:10.1371/journal.ppat.1005121), 2015-09-02

S1 Fig. Amount of Total associated and internalized bacteria per cell.

**A**

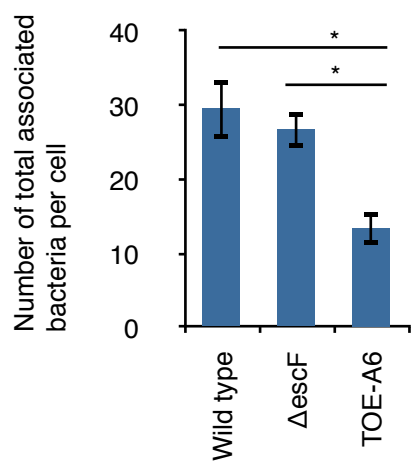

**B**

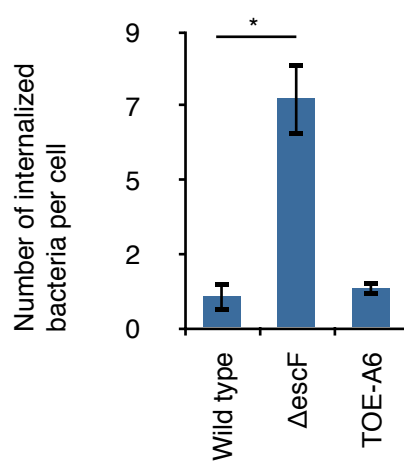

Supplement: ppat.1005121.s001.pdf [file ppat.1005121.s001.pdf]
