# Supplementary material for: Enteropathogenic Escherichia coli Uses NleA to Inhibit NLRP3 Inflammasome Activation
Source: PubMed Central journal article supplement (PMC4557958; doi:10.1371/journal.ppat.1005121), 2015-09-02

**S3 Fig. Cells retain sufficient ubiquitinated NLRP3 after either 15 min or 2 hrs of LPS stimulation with below detectable amount of caspase-1 activation.**

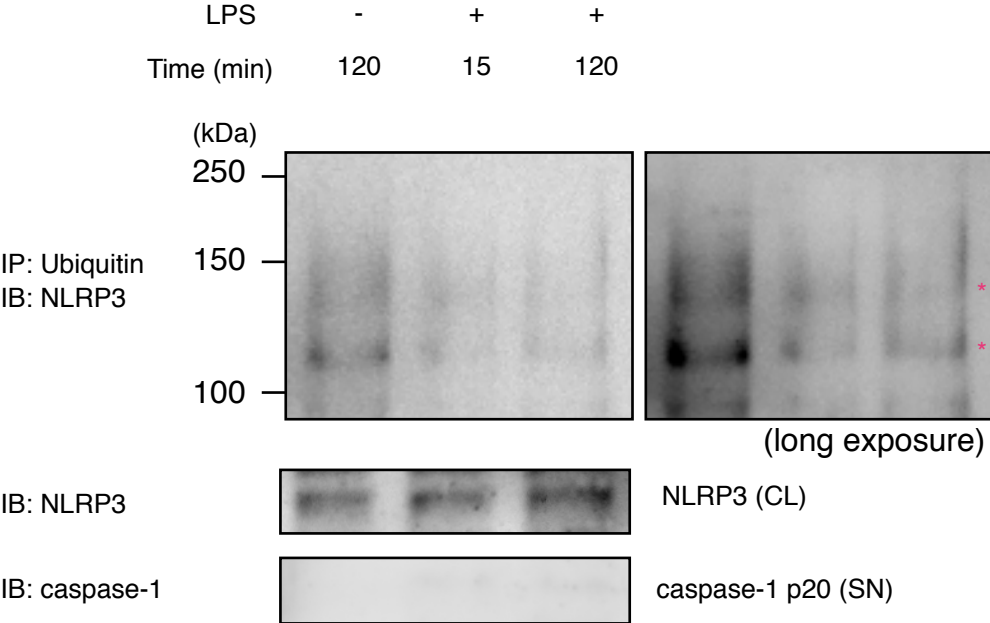

Supplement: ppat.1005121.s003.pdf [file ppat.1005121.s003.pdf]
