# Supplementary material for: Enteropathogenic Escherichia coli Uses NleA to Inhibit NLRP3 Inflammasome Activation
Source: PubMed Central journal article supplement (PMC4557958; doi:10.1371/journal.ppat.1005121), 2015-09-02

**S4 Fig. NieA reduced Caspase-1 activation by combination of pathogen and Nigericin stimulation**

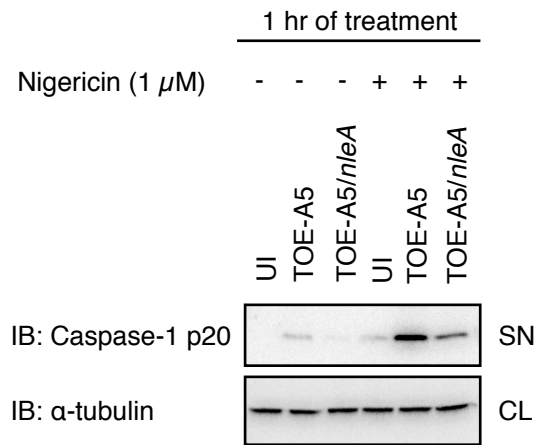

Supplement: ppat.1005121.s004.pdf [file ppat.1005121.s004.pdf]
