# Supplementary material for: Enteropathogenic Escherichia coli Uses NleA to Inhibit NLRP3 Inflammasome Activation
Source: PubMed Central journal article supplement (PMC4557958; doi:10.1371/journal.ppat.1005121), 2015-09-02

S5 Fig. Localization of bacterial delivered NleA-Flag3 in the host cells.

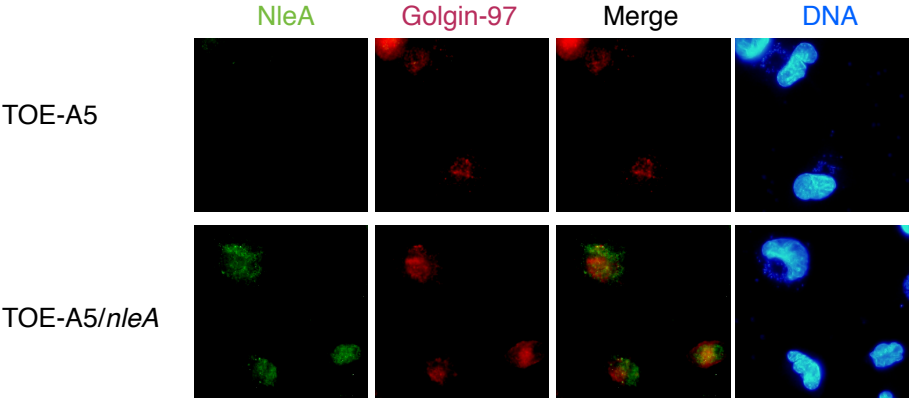

Supplement: ppat.1005121.s005.pdf [file ppat.1005121.s005.pdf]
