# Supplementary material for: Enteropathogenic Escherichia coli Uses NleA to Inhibit NLRP3 Inflammasome Activation
Source: PubMed Central journal article supplement (PMC4557958; doi:10.1371/journal.ppat.1005121), 2015-09-02

**S6 Fig. Effect of NleA C-terminal deletion on Caspase1 activation and IL-1 $\beta$  secretion.**

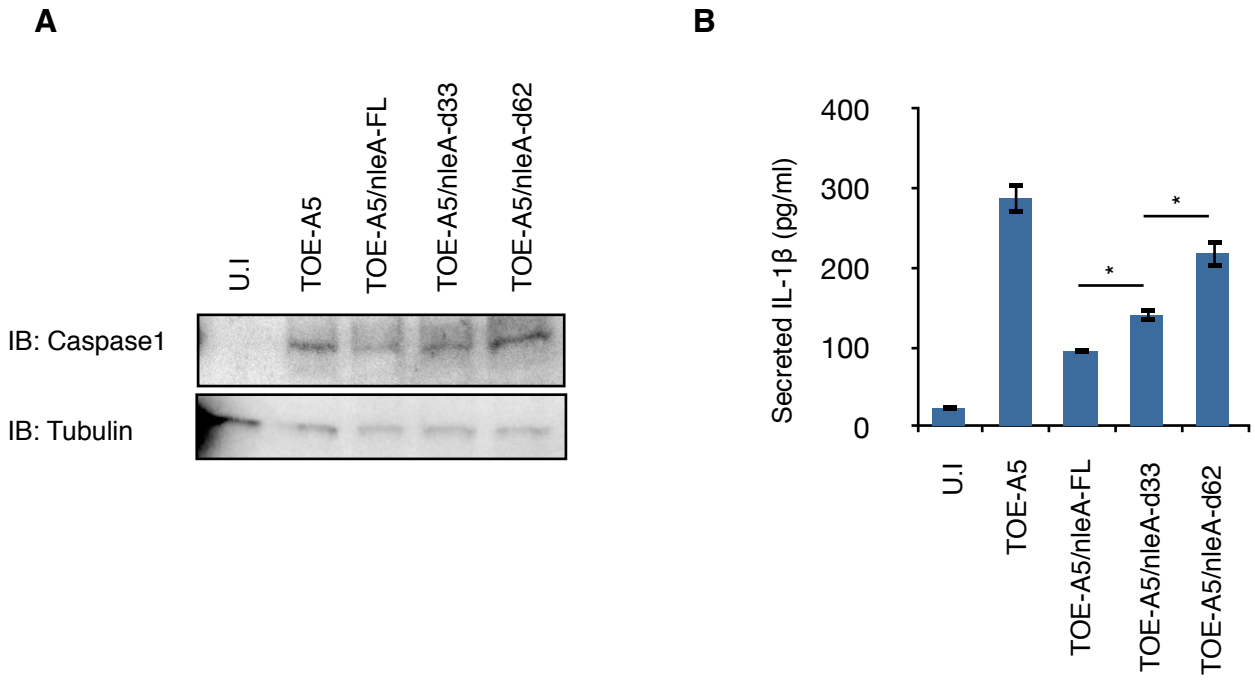

Supplement: ppat.1005121.s006.pdf [file ppat.1005121.s006.pdf]
