# Supplementary material for: Enteropathogenic Escherichia coli Uses NleA to Inhibit NLRP3 Inflammasome Activation
Source: PubMed Central journal article supplement (PMC4557958; doi:10.1371/journal.ppat.1005121), 2015-09-02
Supplement: ppat.1005121.s007.pdf [file ppat.1005121.s007.pdf]

**S1 Table Bacterial strains and plasmid**

| Strain names       | Description                                                                | Reference                                    |
|--------------------|----------------------------------------------------------------------------|----------------------------------------------|
| EPEC E2348/69      | EPEC wild type                                                             | Iguchi et al. (2009)                         |
| TB0661             | E2348/69 $\Delta$ <i>escF</i>                                              | Hilo et al. (2010)                           |
| TB2049             | E2348/69 $\Delta$ <i>nleA</i>                                              | This study                                   |
| TOE-A1             | E2348/69-derivative: the <i>nleE/nleB/espL</i> cluster (on IE2)            | Hilo et al. (2010)                           |
| TOE-A2             | E2348/69-derivative: the <i>nleH/cif/espJ</i> cluster (on PP2)             | Hilo et al. (2010)                           |
| TOE-A3             | E2348/69-derivative: the <i>nleG/nleC/nleD</i> cluster (on IE2)            | Hilo et al. (2010)                           |
| TOE-A4             | E2348/69-derivative: the <i>nleE/nleB/espL</i> cluster (on IE6)            | Hilo et al. (2010)                           |
| TOE-A5             | E2348/69-derivative: the <i>nleH/nleA(espI)/nleF/espO</i> cluster (on PP6) | Hilo et al. (2010)                           |
| TOE-A6             | E2348/69-derivative: the <i>espG2 (orf3)</i> (on IE5) deleted              | Hilo et al. (2010)                           |
| Plasmid names      | Description                                                                | Reference                                    |
| pFLAG3-CTC         | FLAGx3 fusion plasmid: a derivative of pFLAG-CTC (Sigma)                   | Miyahara et al., Cellular Microbiology 2009  |
| pFlag3-NleE        | pFLAG3-CTC derivative: NleE-Flag3 expressing plasmid                       | This study                                   |
| pFlag3-NleB        | pFLAG3-CTC derivative: NleB-Flag3 expressing plasmid                       | This study                                   |
| pFlag3-EspL        | pFLAG3-CTC derivative: EspL-Flag3 expressing plasmid                       | Miyahara et al., Cellular Microbiology 2009  |
| pFlag3-NleA        | pFLAG3-CTC derivative: NleA-Flag3 expressing plasmid                       | This study                                   |
| pFlag3-NleF        | pFLAG3-CTC derivative: NleF-Flag3 expressing plasmid                       | This study                                   |
| pFlag3-NleH        | pFLAG3-CTC derivative: NleH2-Flag3 expressing plasmid                      | This study                                   |
| peGFP-C1           | mammalian expression plasmid for eGFP fusion protein                       | Clontech                                     |
| pF1KB3222          | pF1KOF derivative: NLRP3 clone                                             | Kazusa DNA Res., Nagase et al., DNA Res 2008 |
| peGFP-NleA         | peGFP-C1 derivative: eGFP-NleA expressing plasmid                          | This study                                   |
| pKGC-MC            | mammalian expression plasmid for KGC fusion protein                        | MBL                                          |
| pKGC-MC-NLRP3      | pKGC-MC derivative: KGC-NLRP3 expressing plasmid                           | This study                                   |
| pcDNA3.1+mychis(A) | mammalian expression plasmid for myc-his fusion protein                    | Invitrogen                                   |
| pcDNA3.1-HA-Ubi    | pcDNA3.1+mychis(A) derivative: HA-Ubiquitin expressing plasmid             | This study                                   |
| pcDNA3-mRFP        | Obtained from Addgene. mRFP fusion plasmid. Plasmid#                       | Addgene                                      |
| pcDNA3-NLRP3-mRFP  | pcDNA3-mRFP derivative: NLRP3-mRFP expressing plasmid                      | This study                                   |
| pMAL-c2x           | Maltose-binding protein (MBP) fusion plasmid                               | New England Biolabs                          |
| pMAL-NleA          | pMAL-c2x derivative: MBP-NleA expressing plasmid                           | This study                                   |
| pGEX-6P-1          | GST fusion plasmid                                                         | GE Healthcare Life Sciences                  |
| pGEX-NLRP3         | pGEX-6P-1 derivative: GST-NLRP3 expressing plasmid                         | This study                                   |
| pGEX-NLRP3-PYD     | pGEX-6P-1 derivative: GST-NLRP3-PYD expressing plasmid                     | This study                                   |
| pGEX-NLRP3-NACHT   | pGEX-6P-1 derivative: GST-NLRP3-NACT expressing plasmid                    | This study                                   |
| pGEX-NLRP3-LRR     | pGEX-6P-1 derivative: GST-NLRP3-LRR expressing plasmid                     | This study                                   |

Reference:

Iguchi A, Thomson NR, Ogura Y, Saunders D, Ooka T, et al. (2009) J Bacteriol 191(1): 347-354

Akira Miyahara et al. (2009) Cellular Microbiology. 11(2): 337 - 350.

Hilo Y et al. (2010) PLoS Pathogen. 6(12): e1001231

Nagase, T., et al. (2008) DNA Res. 15:137-149
