# Supplementary material for: Enteropathogenic Escherichia coli Uses NleA to Inhibit NLRP3 Inflammasome Activation
Source: PubMed Central journal article supplement (PMC4557958; doi:10.1371/journal.ppat.1005121), 2015-09-02
Supplement: ppat.1005121.s008.pdf [file ppat.1005121.s008.pdf]

S2 Table Primers and oligonucleotides used in this study

| Oligonucleotide    | Sequence                                                         | Comment                               |
|--------------------|------------------------------------------------------------------|---------------------------------------|
| 3857-N4            | GAAGGAATTCGATATTAACATGATTAGAACAAG                                | NleB                                  |
| 3857-C4            | GTGAGTCGACTGAACTGCAGGTATACATACTGGT                               | NleB                                  |
| NleE-N-NdeI        | GTTGCATATGATTAATCCTGTTACTAATACTCAGG                              | NleE                                  |
| NleE-C-XhoI        | TGGTCTCGAGCTCAATTTTAGAAAAGTTTATTATTTATGT                         | NleE                                  |
| 1815-N2            | CTCTCATATGTTACCAACAAGTGGTTCTTC                                   | NleF                                  |
| 1815-C3            | GTGTCTCGAGTCCACATTGTAAAGATCCTTTGTTG                              | NleF                                  |
| 1812-N2            | CATGCATATGAACATTCAACCGACCATAC                                    | for pFLAG3-NleA                       |
| NleA-R-XhoI-FL1    | CCTTCTCGAGGACTCTTGTTCCTTGGATTATATC                               | for pFLAG3-NleA                       |
| ECs1814-N2         | CTACCATATGTTATCGCCCTCTTCTATA                                     | NleH                                  |
| ECs1814-C4         | ATGGCTCGAGTTACTCCAGTCTGTCAAACATATCG                              | NleH                                  |
| BamHI-ATG-HA-Ubb-N | cgcgGGATCCATGTACCCATACGACGTGCCAGATTACGCTATGCAGATCTTCGTGAAAACCCTT | HA-Ubiquitin                          |
| EcoRI-TAA-Ubb-1-C  | cgcgGAATTCCTTAACCACTCTCAGACGCAGGACCAGG                           | HA-Ubiquitin                          |
| NleA-F1-BglII      | GCATAGATCTGCCGCCACCATGAACATTCAACCGACCATACAATCTG                  | for peGFP-NleA                        |
| NleA-R2-XhoI       | CCTTCTCGAGTTAGACTCTTGTTCCTTGGATTATATC                            | for peGFP-NleA                        |
| NLRP3-F1           | CGATGGATCCGCCACCATGAAGATGGCAAGCACCCGC                            | for NLRP3 subcloning                  |
| NLRP3-R1           | TGACCTCGAGCCAAGAAGGCTCAAAGACGAC                                  | for pcDNA3-NLRP3-mRFP                 |
| NLRP3-R2           | TGACCTCGAGTTACCAAGAAGGCTCAAAGACGAC                               | for pKGC-MC-NLRP3 and pGEX-6P-1-NLRP3 |
| NLRP3-213-R1       | TGACCTCGAGTTACACAGGCTCAGAATGCTCATC                               | for pGEX-6P-1-NLRP3-PYD               |
| NLRP3-213-F1       | CGATGGATCCGCCACCATGGATGAGCATTCTGAGCCTGTG                         | for pGEX-6P-1-NLRP3-NACHT             |
| NLRP3-398-R1       | TGACCTCGAGTTACAGACTGAAGGCTGCCCTGGC                               | for pGEX-6P-1-NLRP3-NACHT             |
| NLRP3-389-F1       | CGATGGATCCATGGCCAGGGCAGCCTTCAGTCTG                               | for pGEX-6P-1-NLRP3-LRR               |
